# Supplementary material
Source: PubMed Central journal article supplement (PMC7883293)

Figure 1.

**B**

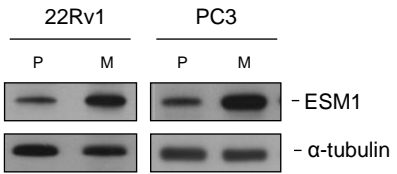

22Rv1

PC3

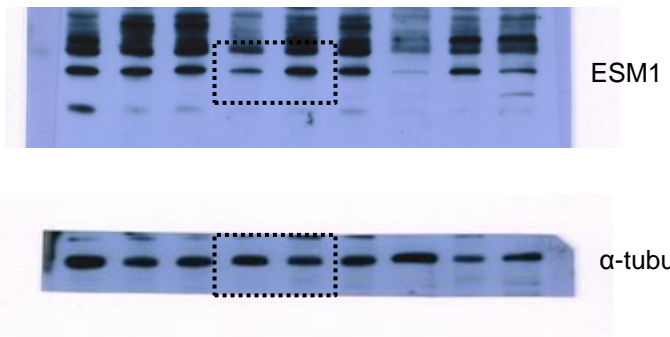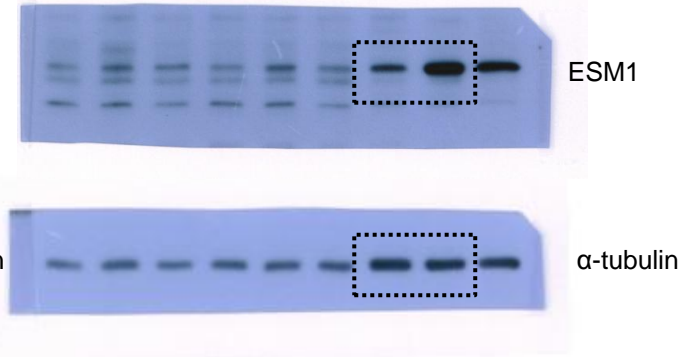

Supplement: EMBJ-40-e105450-s004.pdf [file EMBJ-40-e105450-s004.pdf]

Figure 2.

**A**

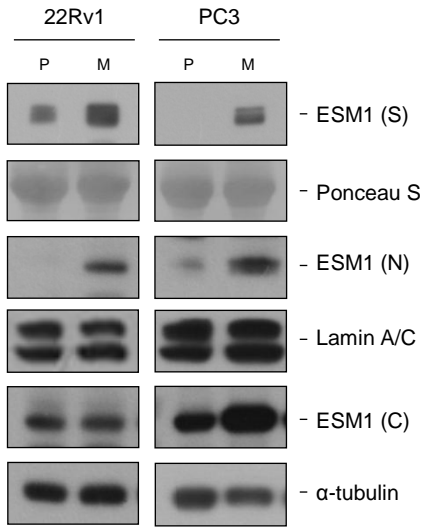

22Rv1

PC3

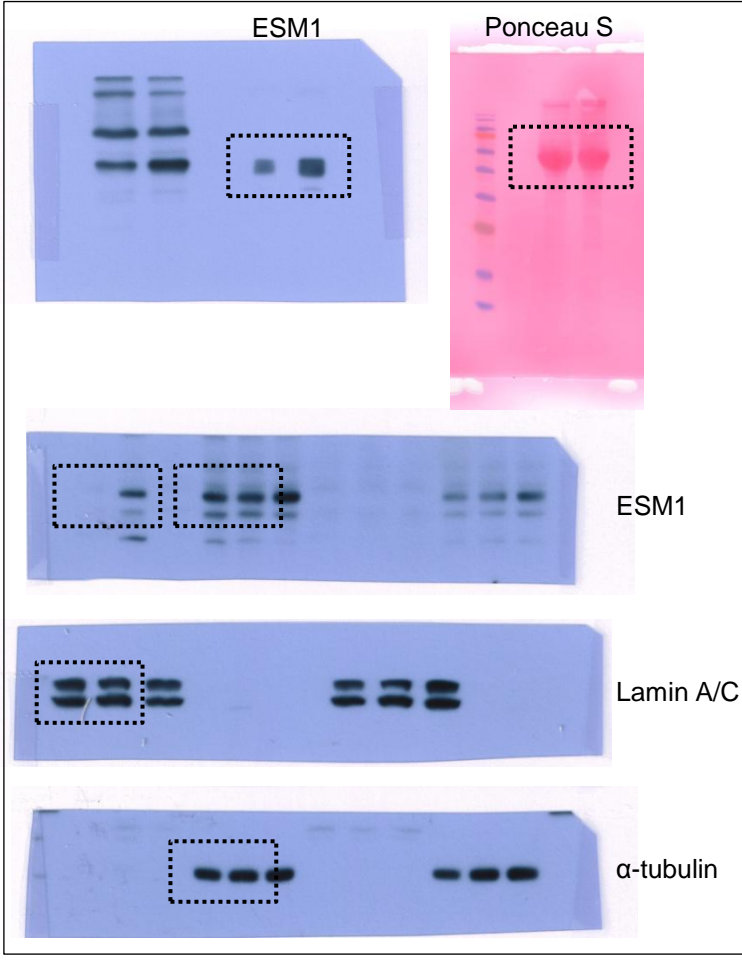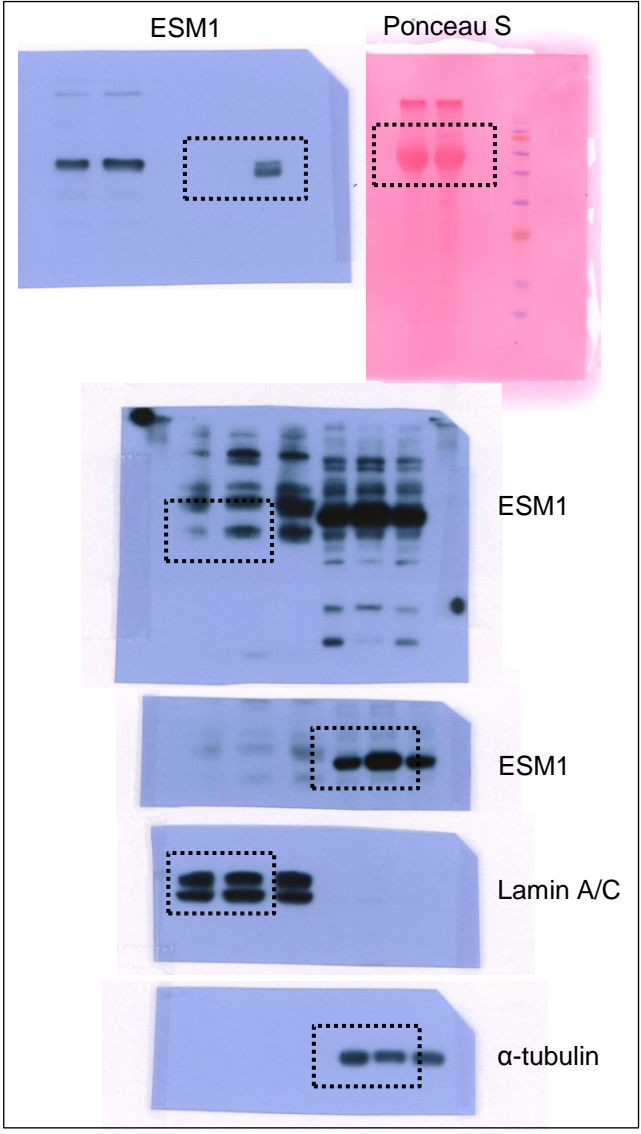

Figure 2.

**D**

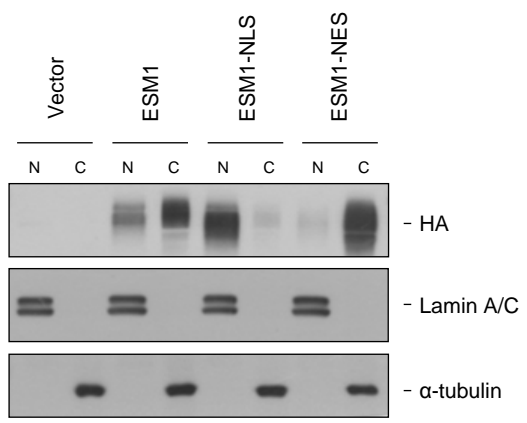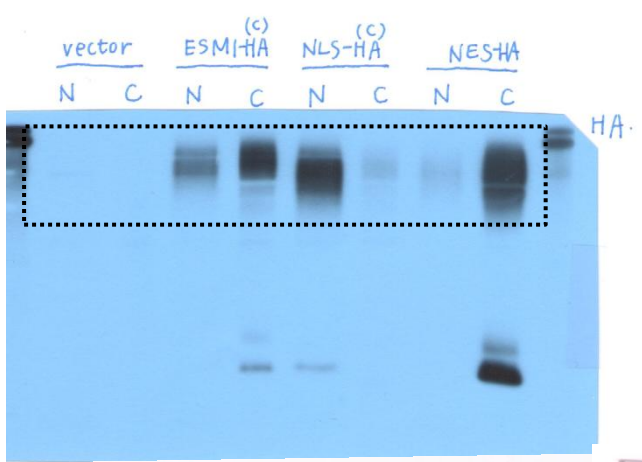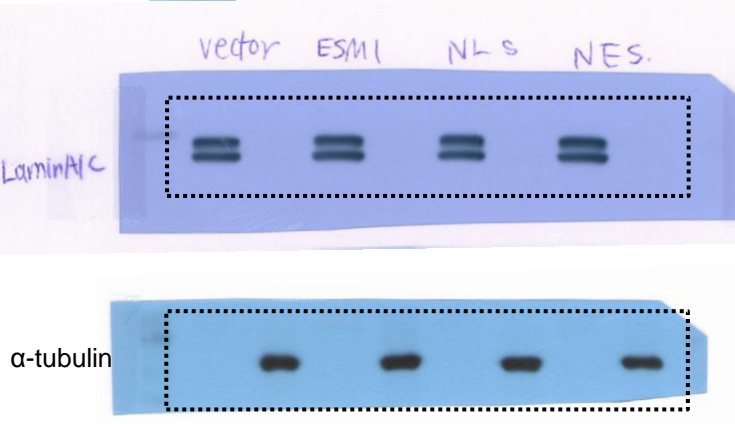

**E**

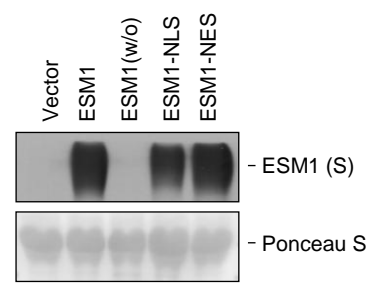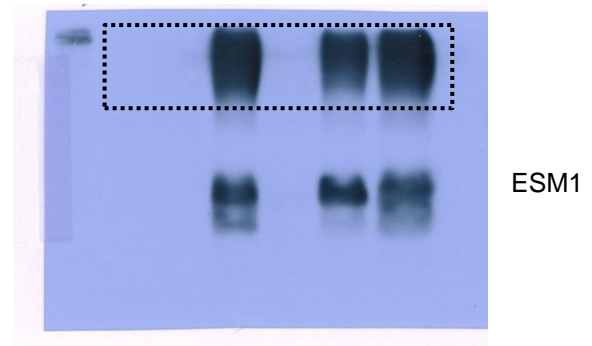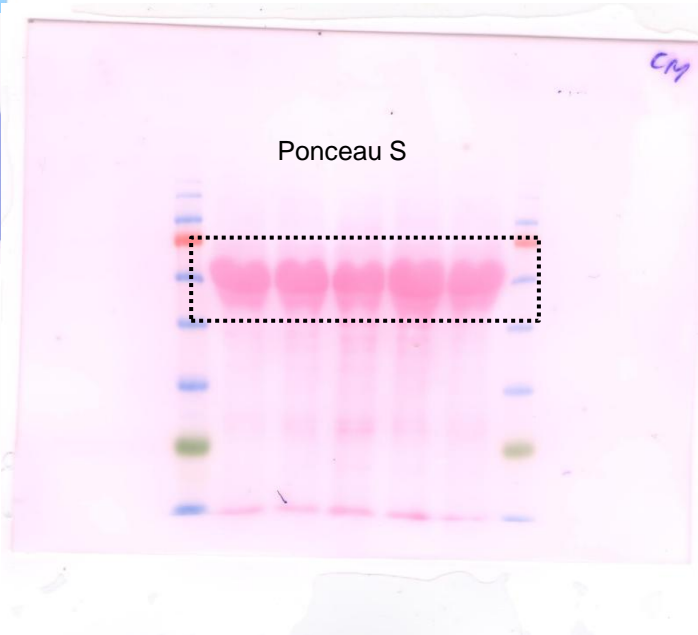

Supplement: EMBJ-40-e105450-s005.pdf [file EMBJ-40-e105450-s005.pdf]

Figure 5.

C

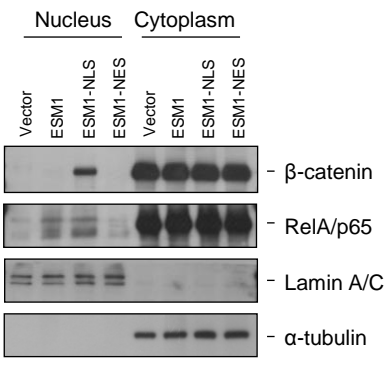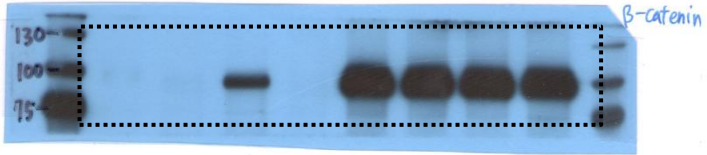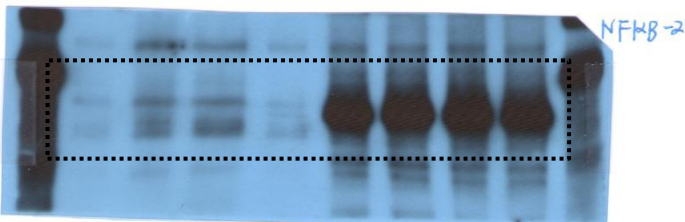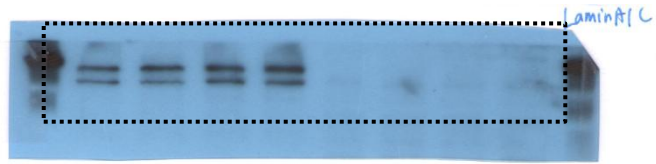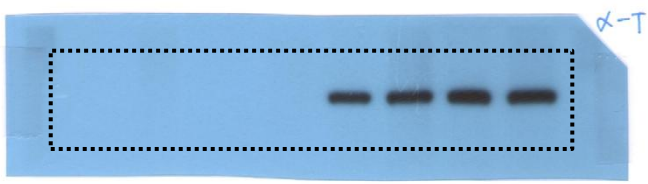

Supplement: EMBJ-40-e105450-s006.pdf [file EMBJ-40-e105450-s006.pdf]

Figure 6.

**A**

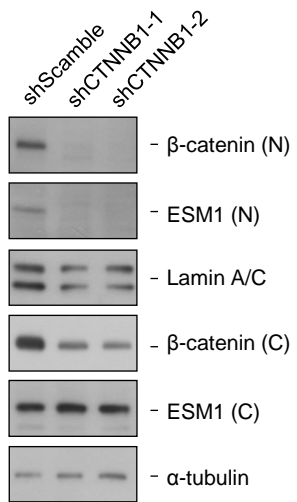

**B**

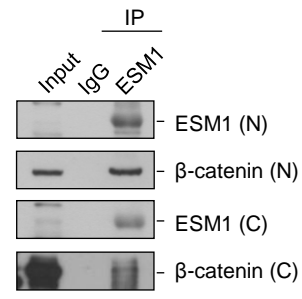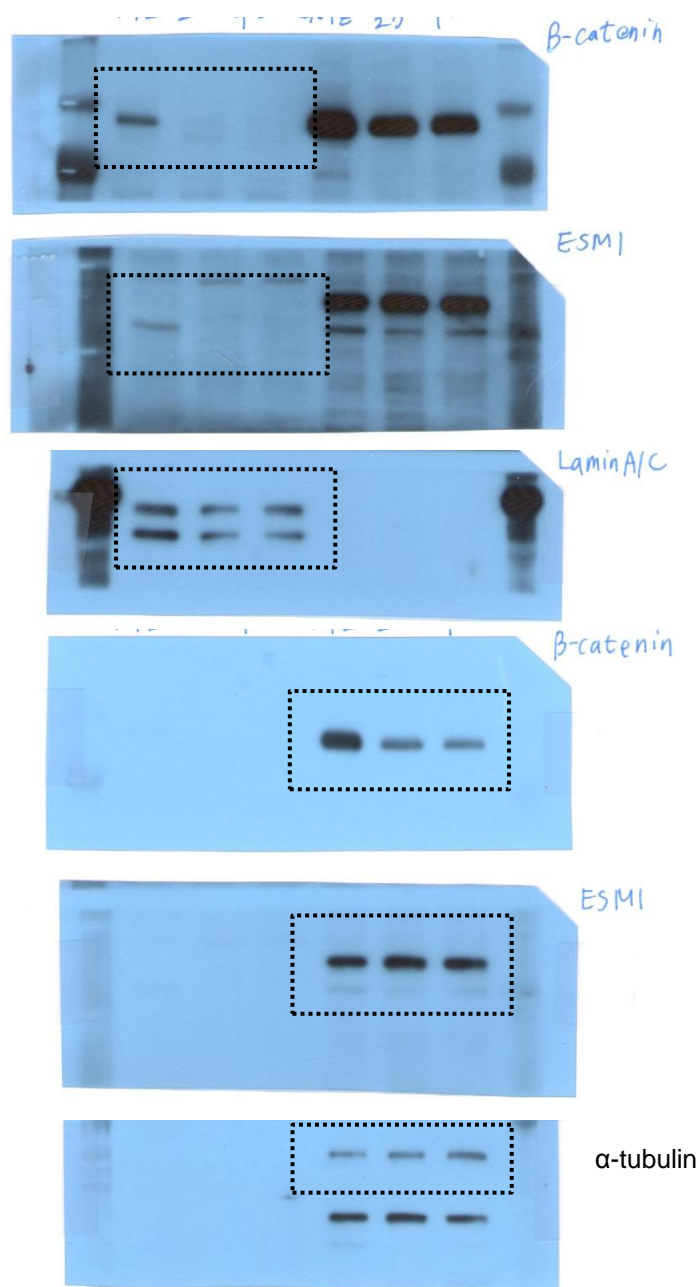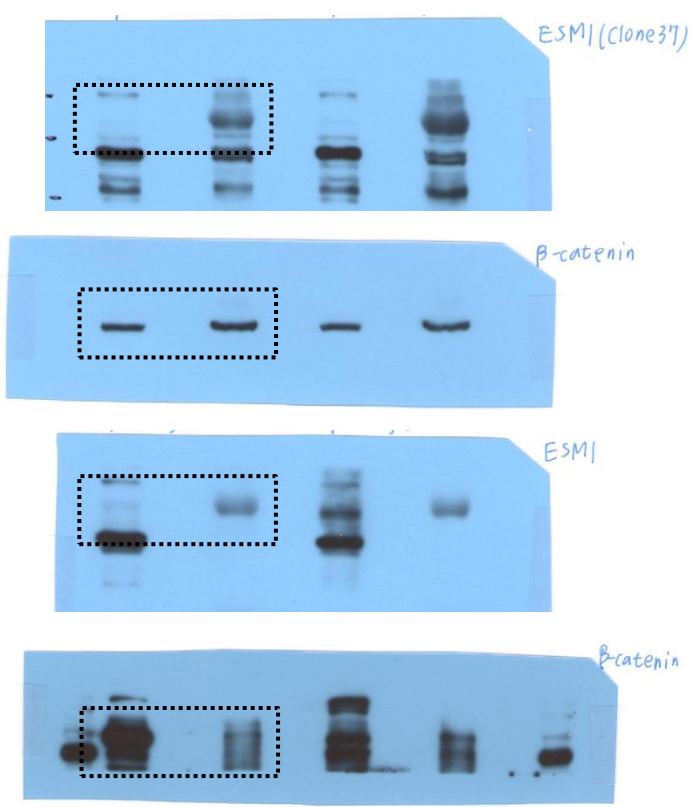

Figure 6.

C

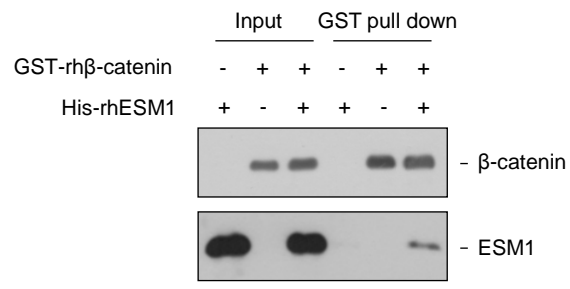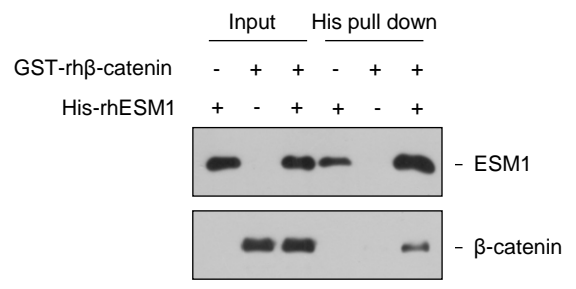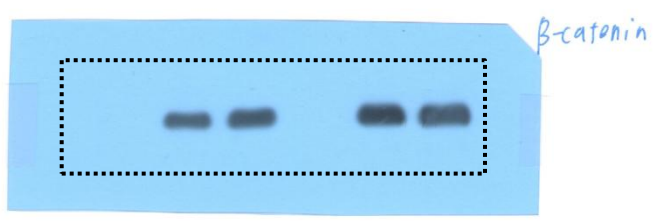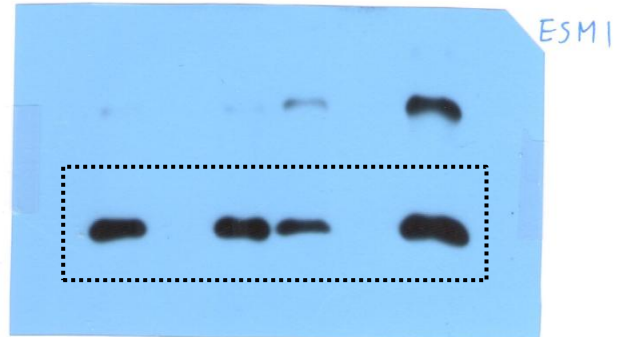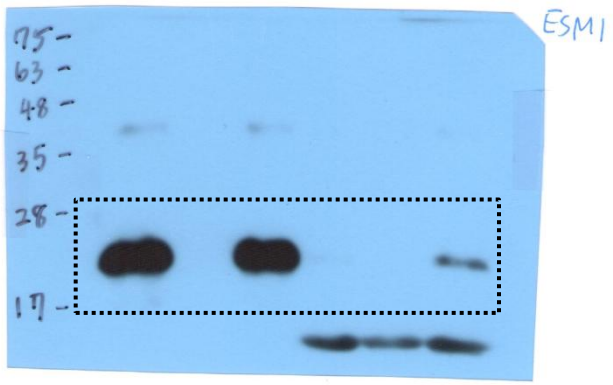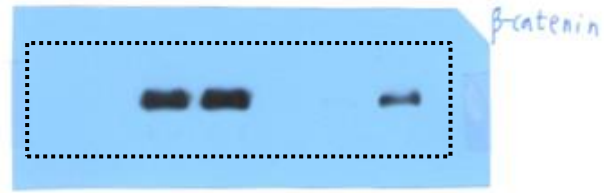

Figure 6.

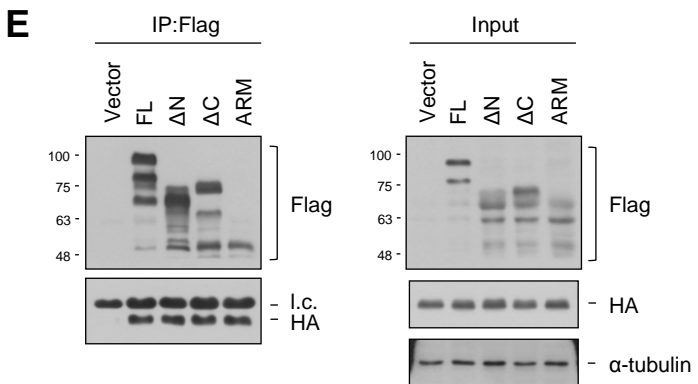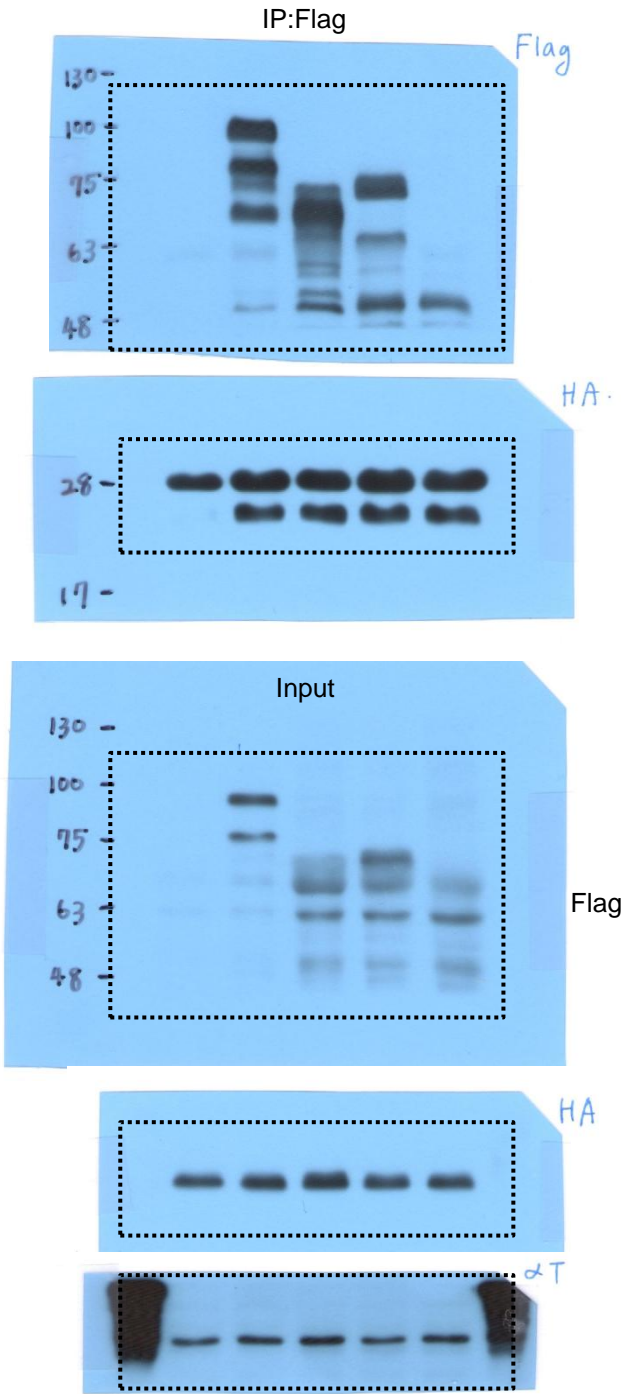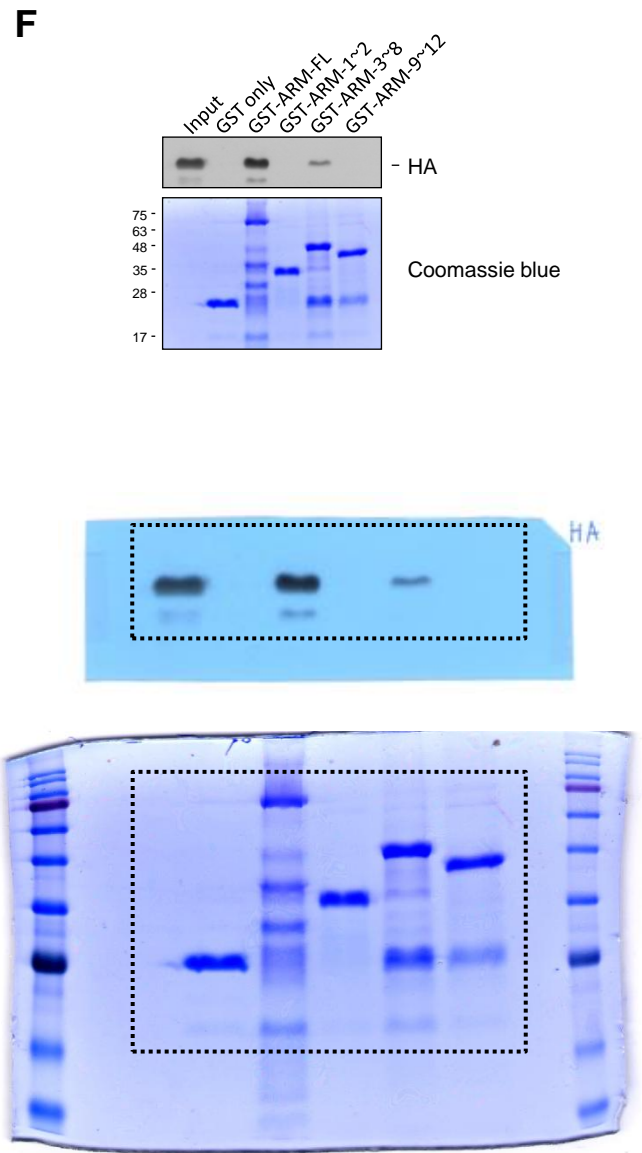

Figure 6.

G

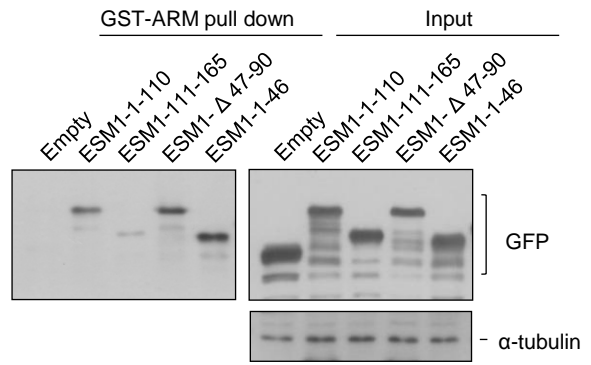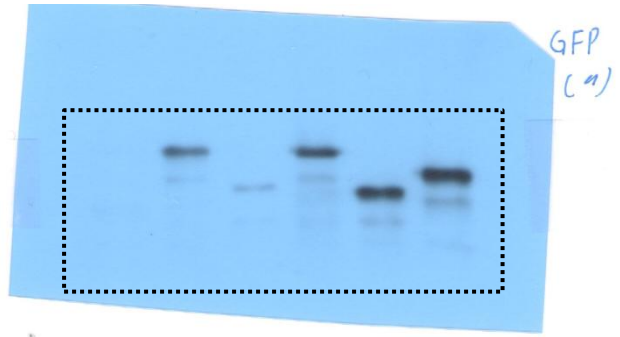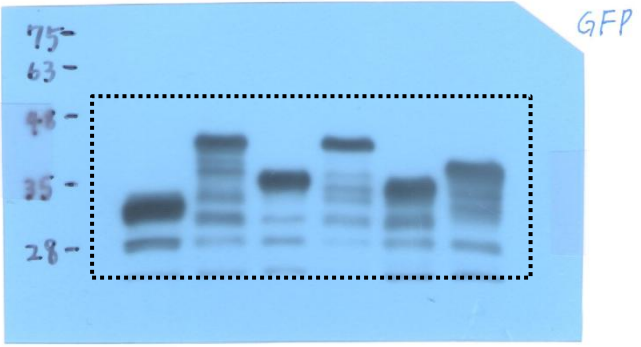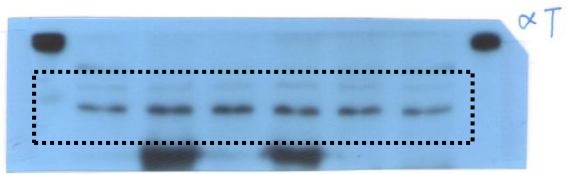

Supplement: EMBJ-40-e105450-s007.pdf [file EMBJ-40-e105450-s007.pdf]

Figure 7.

**B**

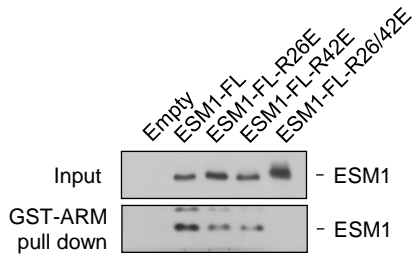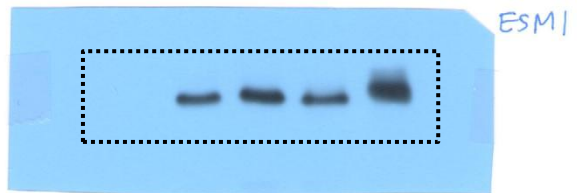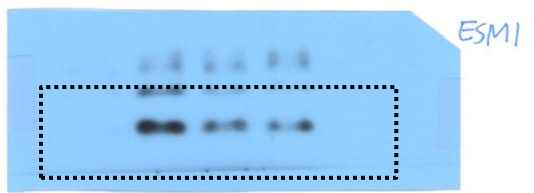

**C**

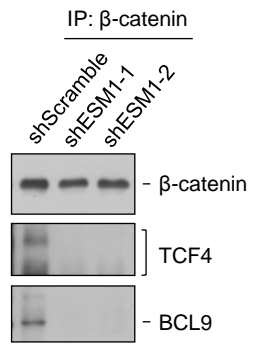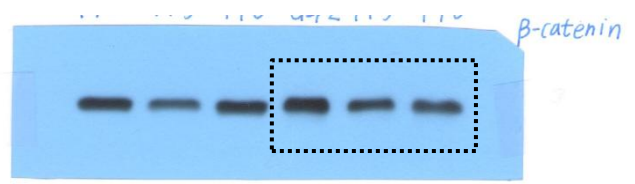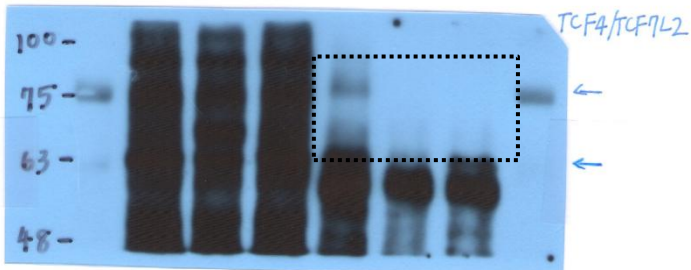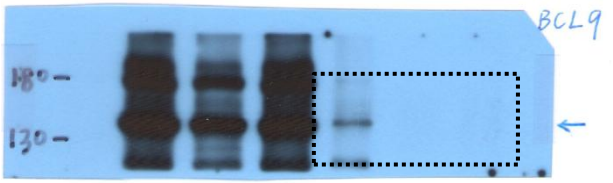

Figure 7.

**E**

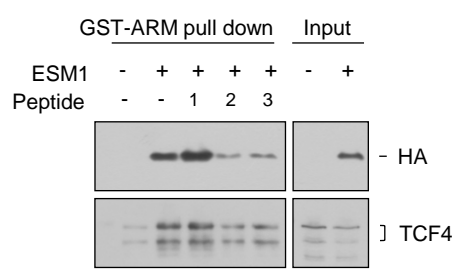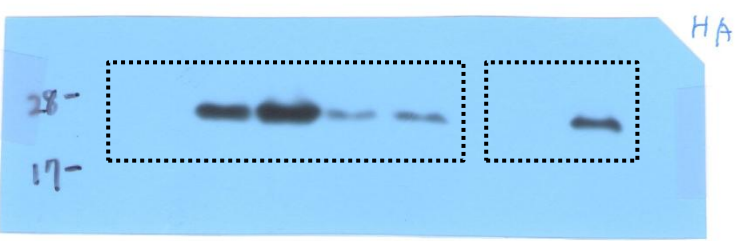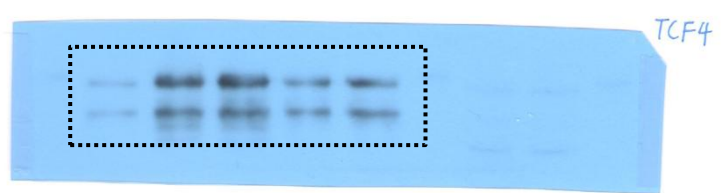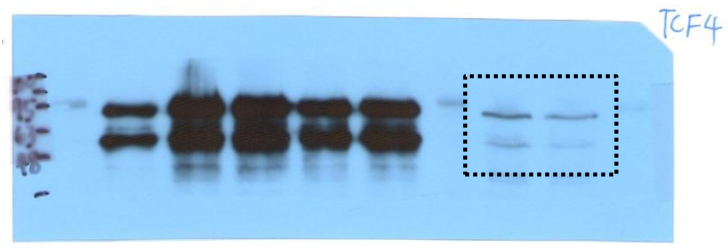

**F**

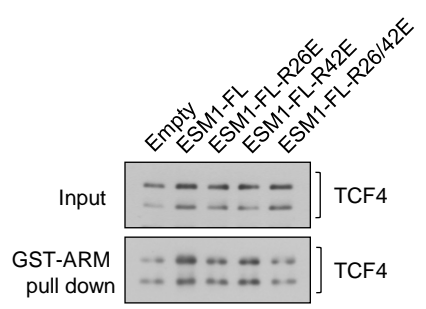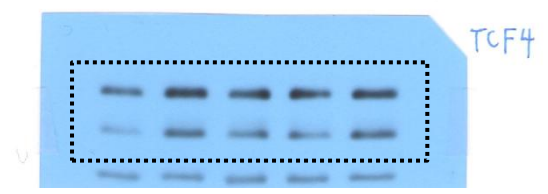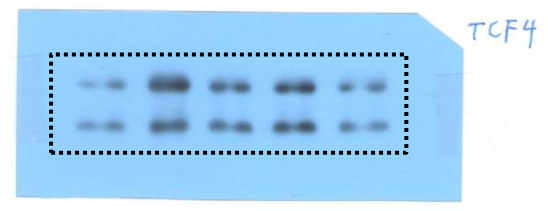

Supplement: EMBJ-40-e105450-s008.pdf [file EMBJ-40-e105450-s008.pdf]
